# Supplementary material for: Microbe-mediated host defence drives the evolution of reduced pathogen virulence
Source: PubMed Central journal article supplement (PMC5116080; doi:10.1038/ncomms13430), 2016-11-15
Supplement: ncomms13430-s1.pdf [file ncomms13430-s1.pdf]

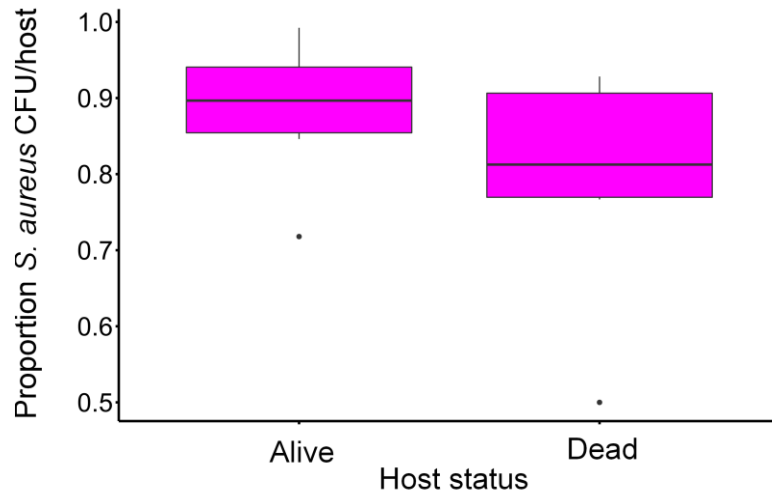

**Supplementary Figure 1.** The proportion *S. aureus* CFU of the total CFU (*S. aureus* + *E. faecalis* CFU) per host in worms alive or dead at 24 hours of exposure. Two sample t-test:  $t = 1.22$ ,  $df = 10$ ,  $P = 0.25$ . Sample size for each treatment: 6 biological replicates.

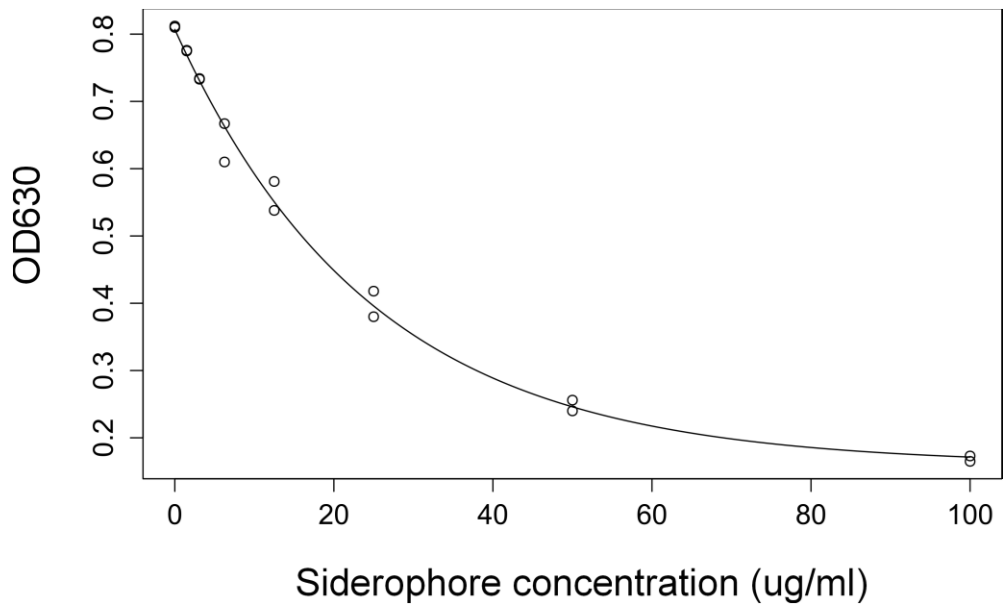

**Supplementary Figure 2.** The relationship between OD630 and siderophore concentration ( $\mu\text{g ml}^{-1}$ ) *in vitro*. Nonlinear (weighted) least-squares estimates of the parameters of a nonlinear model:  $OD = 0.1599 - -0.6471 \cdot \exp(-0.04 \cdot \text{concentration})$ . Sample size: 2 biological replicates for each concentration.

**Supplementary Table 1.** Statistical results listed by figure

| Figure                           | Statistical results                                                                                                                                                                                                                                                                                                                                                                                                                                                                                                                                                                                                                                                                                                                                                                                                    |           |           |         |     |         |                          |          |           |           |       |                                  |          |           |           |       |                                |         |           |           |       |
|----------------------------------|------------------------------------------------------------------------------------------------------------------------------------------------------------------------------------------------------------------------------------------------------------------------------------------------------------------------------------------------------------------------------------------------------------------------------------------------------------------------------------------------------------------------------------------------------------------------------------------------------------------------------------------------------------------------------------------------------------------------------------------------------------------------------------------------------------------------|-----------|-----------|---------|-----|---------|--------------------------|----------|-----------|-----------|-------|----------------------------------|----------|-----------|-----------|-------|--------------------------------|---------|-----------|-----------|-------|
| 2a                               | <p><b>Quasibinomial GLM:</b> <math>F=41.96</math>, <math>df=2</math>, <math>P= 5.193e-09</math></p> <p><u>Tukey contrasts:</u><br/> <i>S. aureus</i> vs. <i>E. faecalis</i>: <math>P&lt;1e-04</math><br/> <i>S. aureus</i> vs. co-colonisation: <math>P&lt;1e-04</math><br/> <i>E. faecalis</i> vs. co-colonisation: <math>P=0.025</math></p> <p><u>Sample size</u> for each treatment: 10 biological replicates.<br/>           Experiment replicated twice.</p>                                                                                                                                                                                                                                                                                                                                                      |           |           |         |     |         |                          |          |           |           |       |                                  |          |           |           |       |                                |         |           |           |       |
| 2b                               | <p><b>Welch two sample t test:</b> <math>t=-4.5</math>, <math>df=16.2</math>, <math>P=0.0003</math></p> <p><u>95 percent confidence interval:</u><br/> <math>-81755.14 -29842.08</math></p> <p><u>Sample size</u> for <i>S aureus</i>: 16 biological replicates.<br/> <u>Sample size</u> for co-infection: 18 biological replicates.<br/>           Experiment replicated 3 times.</p>                                                                                                                                                                                                                                                                                                                                                                                                                                 |           |           |         |     |         |                          |          |           |           |       |                                  |          |           |           |       |                                |         |           |           |       |
| 2c                               | <p><b>Two sample t test:</b> <math>t=-2.8</math>, <math>df=24</math>, <math>P=0.009</math>.</p> <p><u>95 percent confidence interval:</u><br/> <math>-14421.823 -2292.925</math></p> <p><u>Sample size</u> for <i>E faecalis</i>: 11 biological replicates.<br/> <u>Sample size</u> for co-infection: 15 biological replicates.<br/>           Experiment replicated twice.</p>                                                                                                                                                                                                                                                                                                                                                                                                                                        |           |           |         |     |         |                          |          |           |           |       |                                  |          |           |           |       |                                |         |           |           |       |
| 4a                               | <p><b>Quasibinomial GLM:</b> <math>F=25.7</math>, <math>df=2</math>, <math>P=4.627e-05</math></p> <p><u>Tukey contrasts:</u><br/>           Coevolution vs. Ancestor: <math>P&lt;0.001</math><br/>           Coevolution vs. Single evolution: <math>P&lt;0.001</math><br/>           Ancestor vs. Single evolution: <math>P=0.035</math></p> <p><u>Sample size</u> for each treatment: 5 biological replicates (average of 2 technical replicates).<br/>           Experiment replicated twice.</p>                                                                                                                                                                                                                                                                                                                   |           |           |         |     |         |                          |          |           |           |       |                                  |          |           |           |       |                                |         |           |           |       |
| 4b                               | <p><b>Pearson's product-moment correlation:</b> <math>t = 3.38</math>, <math>df = 9</math>, <math>p= 0.008</math>. <math>R^2=0.56</math></p> <p><u>95 percent confidence interval:</u><br/> <math>0.2682905 0.9303416</math></p> <p><u>Sample size</u> for virulence data: as fig.4a but all ancestral replicates averaged to 1 biological replicate.<br/> <u>Sample size</u> for growth rate data: 5 biological replicates (average of 3 technical replicates) for evolved bacteria. 1 biological replicate for ancestral bacteria (average of 8 technical replicates). Anomalous technical replicate points identified and removed using the Dixon test.<br/>           Experiment replicated twice.</p>                                                                                                             |           |           |         |     |         |                          |          |           |           |       |                                  |          |           |           |       |                                |         |           |           |       |
| 4c                               | <p><b>ANOVA:</b> <math>F=6.55</math>, <math>df=2</math>, <math>P=0.012</math></p> <p><u>Tukey contrasts &amp; 95% family-wise confidence level:</u></p> <table border="1"> <thead> <tr> <th></th> <th>diff</th> <th>lwr</th> <th>upr</th> <th>p value</th> </tr> </thead> <tbody> <tr> <td>Ancestor vs Coevolution:</td> <td>-16106.2</td> <td>-31087.38</td> <td>-1125.017</td> <td>0.035</td> </tr> <tr> <td>Single evolution vs Coevolution:</td> <td>-18791.0</td> <td>-33772.18</td> <td>-3809.817</td> <td>0.015</td> </tr> <tr> <td>Single evolution vs. Ancestor:</td> <td>-2684.8</td> <td>-17665.98</td> <td>12296.383</td> <td>0.883</td> </tr> </tbody> </table> <p><u>Sample size</u> for each treatment: 5 biological replicates (1 technical replicate).<br/>           Experiment replicated once.</p> |           | diff      | lwr     | upr | p value | Ancestor vs Coevolution: | -16106.2 | -31087.38 | -1125.017 | 0.035 | Single evolution vs Coevolution: | -18791.0 | -33772.18 | -3809.817 | 0.015 | Single evolution vs. Ancestor: | -2684.8 | -17665.98 | 12296.383 | 0.883 |
|                                  | diff                                                                                                                                                                                                                                                                                                                                                                                                                                                                                                                                                                                                                                                                                                                                                                                                                   | lwr       | upr       | p value |     |         |                          |          |           |           |       |                                  |          |           |           |       |                                |         |           |           |       |
| Ancestor vs Coevolution:         | -16106.2                                                                                                                                                                                                                                                                                                                                                                                                                                                                                                                                                                                                                                                                                                                                                                                                               | -31087.38 | -1125.017 | 0.035   |     |         |                          |          |           |           |       |                                  |          |           |           |       |                                |         |           |           |       |
| Single evolution vs Coevolution: | -18791.0                                                                                                                                                                                                                                                                                                                                                                                                                                                                                                                                                                                                                                                                                                                                                                                                               | -33772.18 | -3809.817 | 0.015   |     |         |                          |          |           |           |       |                                  |          |           |           |       |                                |         |           |           |       |
| Single evolution vs. Ancestor:   | -2684.8                                                                                                                                                                                                                                                                                                                                                                                                                                                                                                                                                                                                                                                                                                                                                                                                                | -17665.98 | 12296.383 | 0.883   |     |         |                          |          |           |           |       |                                  |          |           |           |       |                                |         |           |           |       |

| 5a                               | <p><b>ANOVA:</b> F=6.681, df=2, P=0.01</p> <p><u>Tukey contrasts &amp; 95% family-wise confidence level:</u></p> <table border="1"> <thead> <tr> <th></th> <th>diff</th> <th>lwr</th> <th>upr</th> <th>p value</th> </tr> </thead> <tbody> <tr> <td>Coevolution vs. Ancestor:</td> <td>-0.531180</td> <td>-0.94121802</td> <td>-0.121142</td> <td>0.01</td> </tr> <tr> <td>Single Evolution vs. Ancestor:</td> <td>-0.107136</td> <td>-0.51717402</td> <td>0.302902</td> <td>0.8</td> </tr> <tr> <td>Single Evolution vs Coevolution:</td> <td>0.424044</td> <td>0.01400598</td> <td>0.834082</td> <td>0.04</td> </tr> </tbody> </table> <p><u>Sample size</u> for each treatment: 5 biological replicates (average of 2 technical replicates).<br/>Experiment replicated twice.</p>                                                                                                                                                                            |             | diff      | lwr          | upr     | p value  | Coevolution vs. Ancestor: | -0.531180 | -0.94121802 | -0.121142 | 0.01         | Single Evolution vs. Ancestor:   | -0.107136 | -0.51717402 | 0.302902  | 0.8          | Single Evolution vs Coevolution: | 0.424044 | 0.01400598 | 0.834082  | 0.04         |
|----------------------------------|-----------------------------------------------------------------------------------------------------------------------------------------------------------------------------------------------------------------------------------------------------------------------------------------------------------------------------------------------------------------------------------------------------------------------------------------------------------------------------------------------------------------------------------------------------------------------------------------------------------------------------------------------------------------------------------------------------------------------------------------------------------------------------------------------------------------------------------------------------------------------------------------------------------------------------------------------------------------|-------------|-----------|--------------|---------|----------|---------------------------|-----------|-------------|-----------|--------------|----------------------------------|-----------|-------------|-----------|--------------|----------------------------------|----------|------------|-----------|--------------|
|                                  | diff                                                                                                                                                                                                                                                                                                                                                                                                                                                                                                                                                                                                                                                                                                                                                                                                                                                                                                                                                            | lwr         | upr       | p value      |         |          |                           |           |             |           |              |                                  |           |             |           |              |                                  |          |            |           |              |
| Coevolution vs. Ancestor:        | -0.531180                                                                                                                                                                                                                                                                                                                                                                                                                                                                                                                                                                                                                                                                                                                                                                                                                                                                                                                                                       | -0.94121802 | -0.121142 | 0.01         |         |          |                           |           |             |           |              |                                  |           |             |           |              |                                  |          |            |           |              |
| Single Evolution vs. Ancestor:   | -0.107136                                                                                                                                                                                                                                                                                                                                                                                                                                                                                                                                                                                                                                                                                                                                                                                                                                                                                                                                                       | -0.51717402 | 0.302902  | 0.8          |         |          |                           |           |             |           |              |                                  |           |             |           |              |                                  |          |            |           |              |
| Single Evolution vs Coevolution: | 0.424044                                                                                                                                                                                                                                                                                                                                                                                                                                                                                                                                                                                                                                                                                                                                                                                                                                                                                                                                                        | 0.01400598  | 0.834082  | 0.04         |         |          |                           |           |             |           |              |                                  |           |             |           |              |                                  |          |            |           |              |
| 5b                               | <p><b>Pearson's product-moment correlation:</b> t = 2.8, df = 9, P=0.02. R<sup>2</sup>=0.5.</p> <p><u>95 percent confidence interval:</u><br/>0.1441149 0.9106005</p> <p><u>Sample size</u> for virulence data: as fig.4a but all ancestral replicates averaged to 1 biological replicate.<br/><u>Sample size</u> for siderophore data: as fig.5a but all ancestral replicates averaged to 1 biological replicate.</p>                                                                                                                                                                                                                                                                                                                                                                                                                                                                                                                                          |             |           |              |         |          |                           |           |             |           |              |                                  |           |             |           |              |                                  |          |            |           |              |
| 7a                               | <p><b>Pearson's product-moment correlation:</b> t=6.1, df=2, P=0.026. R<sup>2</sup>=0.95</p> <p><u>95 percent confidence interval:</u><br/>0.2052983 0.9994809</p> <p><u>Sample size:</u> 1 biological replicate for each concentration (average of 2 technical replicates).<br/>Experiment replicated once.</p>                                                                                                                                                                                                                                                                                                                                                                                                                                                                                                                                                                                                                                                |             |           |              |         |          |                           |           |             |           |              |                                  |           |             |           |              |                                  |          |            |           |              |
| 7b                               | <p><b>ANOVA:</b> F=9.2, df=3, P=0.0009</p> <p><u>Dunnett contrasts:</u></p> <p>Coevolution <i>S. aureus</i> &amp; ancestral <i>E. faecalis</i> vs. ancestral <i>E. faecalis</i>: P=0.77<br/>Single evolution <i>S. aureus</i> &amp; ancestral <i>E. faecalis</i> vs. ancestral <i>E. faecalis</i>: P=0.023<br/>Ancestor <i>S. aureus</i> &amp; ancestral <i>E. faecalis</i> vs. ancestral <i>E. faecalis</i>: P&lt;0.001</p> <p><u>Sample size</u> for each treatment: 5 biological replicates (1 technical replicate).<br/>Experiment replicated once.</p>                                                                                                                                                                                                                                                                                                                                                                                                     |             |           |              |         |          |                           |           |             |           |              |                                  |           |             |           |              |                                  |          |            |           |              |
| 7c                               | <p><b>Control ANOVA:</b> F=8.1, df=2, fdr corrected P=0.019</p> <p><u>Tukey contrasts &amp; 95% family-wise confidence level:</u></p> <table border="1"> <thead> <tr> <th></th> <th>diff</th> <th>lwr</th> <th>upr</th> <th>p value</th> </tr> </thead> <tbody> <tr> <td>Ancestor vs Coevolution:</td> <td>212500000</td> <td>4318164</td> <td>420681836</td> <td>0.046</td> </tr> <tr> <td>Single evolution vs Coevolution:</td> <td>290000000</td> <td>81818164</td> <td>498181836</td> <td>0.009</td> </tr> <tr> <td>Single evolution vs. Ancestor:</td> <td>77500000</td> <td>-130681836</td> <td>285681836</td> <td>0.57</td> </tr> </tbody> </table> <p><b>+Fe<sup>3+</sup> ANOVA Treatment:</b> F=3.05, df=2, fdr corrected P=0.092.</p> <p><u>Sample size</u> for each treatment of both ANOVAs: 5 biological replicates (1 technical replicate).<br/>Anomalous points identified and removed using the Dixon test.<br/>Experiment replicated once.</p> |             | diff      | lwr          | upr     | p value  | Ancestor vs Coevolution:  | 212500000 | 4318164     | 420681836 | 0.046        | Single evolution vs Coevolution: | 290000000 | 81818164    | 498181836 | 0.009        | Single evolution vs. Ancestor:   | 77500000 | -130681836 | 285681836 | 0.57         |
|                                  | diff                                                                                                                                                                                                                                                                                                                                                                                                                                                                                                                                                                                                                                                                                                                                                                                                                                                                                                                                                            | lwr         | upr       | p value      |         |          |                           |           |             |           |              |                                  |           |             |           |              |                                  |          |            |           |              |
| Ancestor vs Coevolution:         | 212500000                                                                                                                                                                                                                                                                                                                                                                                                                                                                                                                                                                                                                                                                                                                                                                                                                                                                                                                                                       | 4318164     | 420681836 | 0.046        |         |          |                           |           |             |           |              |                                  |           |             |           |              |                                  |          |            |           |              |
| Single evolution vs Coevolution: | 290000000                                                                                                                                                                                                                                                                                                                                                                                                                                                                                                                                                                                                                                                                                                                                                                                                                                                                                                                                                       | 81818164    | 498181836 | 0.009        |         |          |                           |           |             |           |              |                                  |           |             |           |              |                                  |          |            |           |              |
| Single evolution vs. Ancestor:   | 77500000                                                                                                                                                                                                                                                                                                                                                                                                                                                                                                                                                                                                                                                                                                                                                                                                                                                                                                                                                        | -130681836  | 285681836 | 0.57         |         |          |                           |           |             |           |              |                                  |           |             |           |              |                                  |          |            |           |              |
| Supp 1                           | <p><b>Two sample t-test:</b> t = 1.22, df = 10, P= 0.25.</p> <p><u>95 percent confidence interval:</u><br/>-0.07642428 0.26070806</p> <p><u>Sample size</u> for each treatment: 6 biological replicates. Experiment replicated once.</p>                                                                                                                                                                                                                                                                                                                                                                                                                                                                                                                                                                                                                                                                                                                        |             |           |              |         |          |                           |           |             |           |              |                                  |           |             |           |              |                                  |          |            |           |              |
| Supp 2                           | <p><b>Nonlinear (weighted) least-squares estimates of the parameters of a nonlinear model:</b><br/>OD = 0.1599 - -0.6471*exp(-0.04*concentration)</p> <p><u>Parameters:</u></p> <table border="1"> <thead> <tr> <th></th> <th>Estimate</th> <th>Std. Error</th> <th>t value</th> <th>Pr(&gt; t )</th> </tr> </thead> <tbody> <tr> <td>a</td> <td>0.159890</td> <td>0.014898</td> <td>10.73</td> <td>7.88e-08 ***</td> </tr> <tr> <td>b</td> <td>-0.647120</td> <td>0.015333</td> <td>-42.20</td> <td>2.68e-15 ***</td> </tr> <tr> <td>c</td> <td>0.040329</td> <td>0.002729</td> <td>14.78</td> <td>1.66e-09 ***</td> </tr> </tbody> </table> <p>Signif. codes: 0 '***' 0.001 '**' 0.01 '*' 0.05 '.' 0.1 ' ' 1</p> <p>Residual standard error: 0.01949 on 13 degrees of freedom</p>                                                                                                                                                                             |             | Estimate  | Std. Error   | t value | Pr(> t ) | a                         | 0.159890  | 0.014898    | 10.73     | 7.88e-08 *** | b                                | -0.647120 | 0.015333    | -42.20    | 2.68e-15 *** | c                                | 0.040329 | 0.002729   | 14.78     | 1.66e-09 *** |
|                                  | Estimate                                                                                                                                                                                                                                                                                                                                                                                                                                                                                                                                                                                                                                                                                                                                                                                                                                                                                                                                                        | Std. Error  | t value   | Pr(> t )     |         |          |                           |           |             |           |              |                                  |           |             |           |              |                                  |          |            |           |              |
| a                                | 0.159890                                                                                                                                                                                                                                                                                                                                                                                                                                                                                                                                                                                                                                                                                                                                                                                                                                                                                                                                                        | 0.014898    | 10.73     | 7.88e-08 *** |         |          |                           |           |             |           |              |                                  |           |             |           |              |                                  |          |            |           |              |
| b                                | -0.647120                                                                                                                                                                                                                                                                                                                                                                                                                                                                                                                                                                                                                                                                                                                                                                                                                                                                                                                                                       | 0.015333    | -42.20    | 2.68e-15 *** |         |          |                           |           |             |           |              |                                  |           |             |           |              |                                  |          |            |           |              |
| c                                | 0.040329                                                                                                                                                                                                                                                                                                                                                                                                                                                                                                                                                                                                                                                                                                                                                                                                                                                                                                                                                        | 0.002729    | 14.78     | 1.66e-09 *** |         |          |                           |           |             |           |              |                                  |           |             |           |              |                                  |          |            |           |              |

Number of iterations to convergence: 4

Achieved convergence tolerance: 2.732e-07

Sample size: 2 biological replicates for each concentration.

Experiment replicated once.

**Supplementary Table 2.** Mutations found in *S. aureus* listed by treatment and replicate population. Locus tag is given when mutation occurs in a coding region. Otherwise, the coordinate is given. Mutation abundance is the percentage of 40 sampled clones that contain the mutation in the replicate population. Only mutations present in >20% clones are listed to control false positives at the expense of low frequency true positives. Gene names and putative gene function are given where known, along with a reference. A proposed link with siderophore activity is listed where identified. Mutation type: S=synonymous. N=non-synonymous. \*=stop gain. \*/= stop loss.

| Treatment   | Replicate | Locus tag/<br>coordinate | Mutation<br>type | Mutation<br>abundance<br>(%) | Gene<br>name/annotation                                                          | Putative function                                                                                | Putative link<br>with<br>siderophores                         | Reference<br>(PMID)  |
|-------------|-----------|--------------------------|------------------|------------------------------|----------------------------------------------------------------------------------|--------------------------------------------------------------------------------------------------|---------------------------------------------------------------|----------------------|
| Coevolution | 1         | SAS_RS09425              | N                | 95                           | Protein export protein PrsA Foldase.                                             | A facultative facilitator of protein secretion or extracellular folding. Cell wall biosynthesis. | Excretion or folding of proteins involved in iron acquisition | 22526301<br>21765893 |
|             | 2         | SAS_RS00600              | *                | 98                           | Hypothetical protein.                                                            | ABC transporter superfamily.                                                                     | Transport of substrates involved in iron acquisition          | 25414356             |
|             |           | 549806                   |                  | 100                          | Between pyrimidine nucleoside transporter NupC & transcriptional regulator CtsR. |                                                                                                  |                                                               |                      |
|             |           | SAS_RS02825              | N                | 30                           | Glycosyl transferase family 1.                                                   | Cell wall biosynthesis.                                                                          |                                                               | 17237164             |
|             |           | SAS_RS02905              | S                | 100                          | Uracil-DNA glycosylase.                                                          | DNA base-excision repair.                                                                        |                                                               | 2836397              |
|             |           | SAS_RS04210              | N                | 23                           | Cysteine desulfurase.                                                            | iron-sulphur cluster biosynthesis.                                                               |                                                               | 11577100             |
|             |           | SAS_RS13205              | N                | 98                           | Holin-like protein CidB.                                                         | Cytolysis. Cellular suicide in response to cellular stress or damage.                            |                                                               | 12670989<br>14617136 |
|             | 3         | 629811                   |                  | 95                           | Between octanoyl-[GcvH]:protein N-octanoyltransferase and mevalonate kinase.     |                                                                                                  |                                                               |                      |
|             |           | SAS_RS05930              | N                | 43                           | Penicillin-binding protein.                                                      | Cell wall biosynthesis.                                                                          |                                                               | 3882429              |
|             |           | 1267927                  |                  | 30                           | Between DNA topoisomerase 1 and TrmFO.                                           | TrmFO: oxidoreductase flavoprotein.                                                              | TRmFO: Siderophore-iron reductase                             |                      |

| Treatment | Replicate | Locus tag/<br>coordinate | Mutation<br>type | Mutation<br>abundance<br>(%) | Gene<br>name/annotation                                              | Putative function                                                                                                                                    | Putative link<br>with<br>siderophores                | Reference<br>(PMID)  |
|-----------|-----------|--------------------------|------------------|------------------------------|----------------------------------------------------------------------|------------------------------------------------------------------------------------------------------------------------------------------------------|------------------------------------------------------|----------------------|
|           |           | SAS_RS07345              | N                | 98                           | Sulphite reductase subunit alpha.                                    | Sulphite to sulphide reduction. Iron ion binding. Oxidoreductase. ferrisiderophore reduction. Hydrogen sulphide biosynthesis. Sulphate assimilation. | Siderophore-iron reductase                           | 7657631              |
|           |           | 1839866                  |                  | 28                           | Between MarR family transcriptional regulator and lysophospholipase. |                                                                                                                                                      |                                                      |                      |
|           |           | SAS_RS11185              | N                | 43                           | Methicillin resistance protein FmtB.                                 | Cell wall biosynthesis.                                                                                                                              |                                                      | 17951380<br>10896508 |
|           |           | SAS_RS13665              | N                | 55                           | Hypothetical protein.                                                | No conserved domains identified.                                                                                                                     |                                                      |                      |
|           | 4         | SAS_RS13620              | */               | 80                           | Anaerobic ribonucleoside-triphosphate reductase activating protein.  | Oxidoreductase. Iron-sulfur cluster binding.                                                                                                         | Siderophore-iron reductase                           | 10821845             |
|           | 5         | SAS_RS03320              | N                | 93                           | Membrane protein.                                                    | Solute carrier families 5 and 6-like. Transports inorganic ions, sugars, amino acids.                                                                | Transport of substrates involved in iron acquisition | 25414356             |
|           |           | SAS_RS12635              | N                | 25                           | Glycerate kinase.                                                    | Glycine metabolism.                                                                                                                                  | Ferrichrome siderophore is made of glycine residues  |                      |

| Treatment        | Replicate | Locus tag/<br>coordinate | Mutation<br>type | Mutation<br>abundance<br>(%) | Gene<br>name/annotation               | Putative function                                                                                 | Putative link<br>with<br>siderophores                | Reference<br>(PMID)                    |  |
|------------------|-----------|--------------------------|------------------|------------------------------|---------------------------------------|---------------------------------------------------------------------------------------------------|------------------------------------------------------|----------------------------------------|--|
| Single Evolution | 1         | SAS_RS06355              | N                | 28                           | RIP metalloprotease RseP.             | Coordinating gene transcription during extracytoplasmic stress response.                          |                                                      | 12073657                               |  |
|                  |           | SAS_RS09685              | N                | 50                           | 2-hydroxyacid dehydrogenase.          | Oxidoreductase.                                                                                   |                                                      | 17049749                               |  |
|                  | 2         | 10884                    |                  |                              | 33                                    | Between carbohydrate kinase and histidine ammonia-lyase.                                          |                                                      |                                        |  |
|                  |           | SAS_RS01275              | N                | 35                           | Ribose transporter RbsU.              | Sugar transport across bacterial membrane. Uptake of ribose.                                      |                                                      | 10941799                               |  |
|                  |           | SAS_RS03290              | N                | 28                           | Ferrichrome ABC transporter permease. | Part of the ABC transporter involved in iron-siderophore import.                                  | Transport of substrates involved in iron acquisition | 3020380                                |  |
|                  |           | SAS_RS03845              | *                | 30                           | Helicase.                             | ATP-dependent RNA or DNA unwinding.                                                               |                                                      |                                        |  |
|                  |           | SAS_RS04065              | S                | 25                           | Thermonuclease.                       | Catalyses the hydrolysis of both DNA and RNA.                                                     |                                                      | 6307819                                |  |
|                  | 3         | 626196                   |                  |                              | 25                                    | Between hypothetical protein and heme-binding protein.                                            |                                                      | Heme-binding protein; iron acquisition |  |
|                  |           | SAS_RS05650              | N                | 28                           | Heme uptake system protein IsdE.      | ABC transport of heme, siderophores and metal ions.                                               | Transport of substrates involved in iron acquisition | 15240116                               |  |
|                  |           | 1985301                  |                  |                              | 33                                    | Between aspartyl/ glutamyl-tRNA(Asn/Gln) amidotransferase subunit C and sodium:proline symporter. |                                                      |                                        |  |
|                  |           | SAS_RS11115              | N                | 38                           | Membrane protein.                     | No conserved domains identified.                                                                  |                                                      |                                        |  |

| Treatment | Replicate | Locus tag/<br>coordinate | Mutation<br>type | Mutation<br>abundance<br>(%) | Gene<br>name/annotation                      | Putative function                                                                                             | Putative link<br>with<br>siderophores | Reference<br>(PMID) |
|-----------|-----------|--------------------------|------------------|------------------------------|----------------------------------------------|---------------------------------------------------------------------------------------------------------------|---------------------------------------|---------------------|
|           |           | SAS_RS12235              | N                | 33                           | DNA-binding<br>response regulator.           | Contains a signal<br>receiver domain,<br>an effector<br>domain and a<br>DNA-binding<br>response<br>regulator. |                                       |                     |
|           |           | SAS_RS13800              | N                | 30                           | Surface anchored<br>protein.                 | No conserved<br>domains<br>identified.                                                                        |                                       |                     |
|           | 4         | No mutations<br>>20%     |                  |                              |                                              |                                                                                                               |                                       |                     |
|           | 5         | SAS_RS12000              | N                | 23                           | RpiR family<br>transcriptional<br>regulator. | Transcription<br>factor.                                                                                      |                                       |                     |
